# Supplementary material for: Development of a metric for tracking and comparing population health based on the minimal generic set of domains of functioning and health
Source: PubMed Central journal article supplement (PMC4866300; doi:10.1186/s12963-016-0088-y), 2016-05-12

**Felt everything was an effort**  
Threshold 1

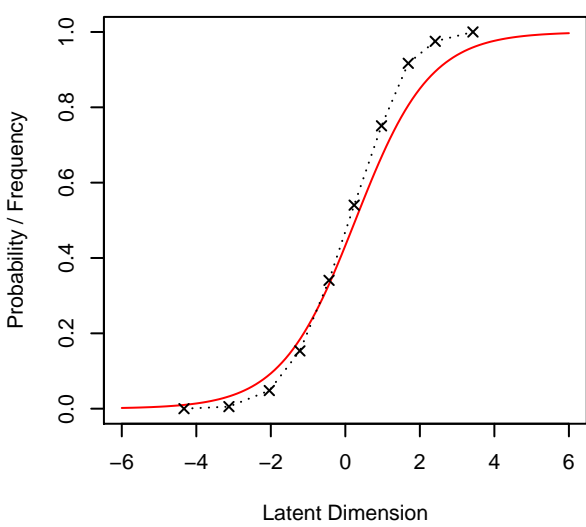

**Felt everything was an effort**  
Threshold 2

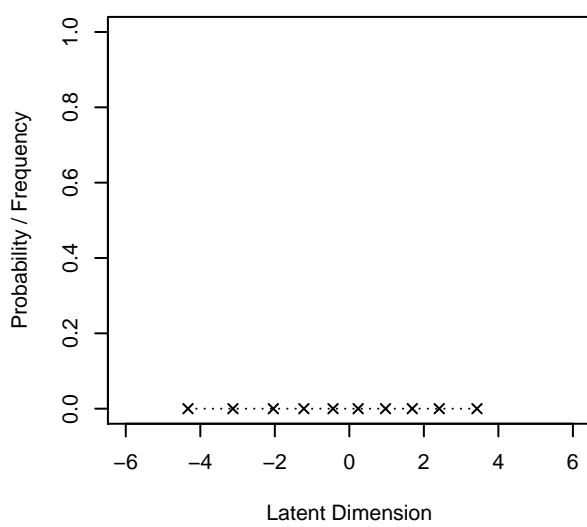

**Felt everything was an effort**  
Threshold 3

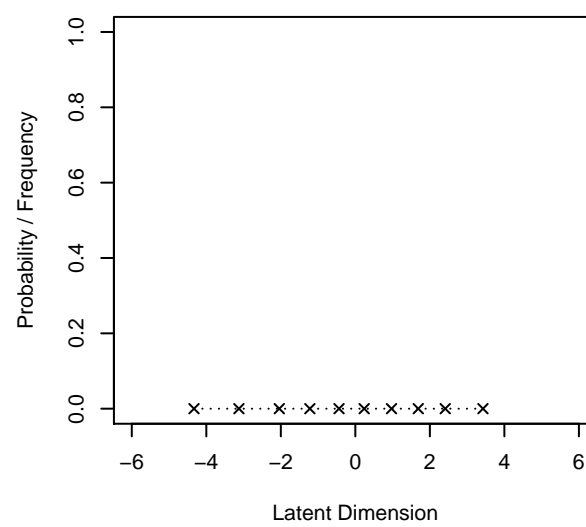

**Felt could not get going**  
Threshold 1

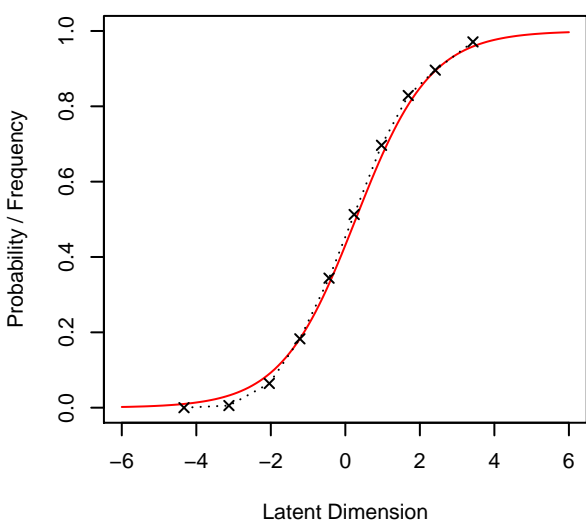

**Felt could not get going**  
Threshold 2

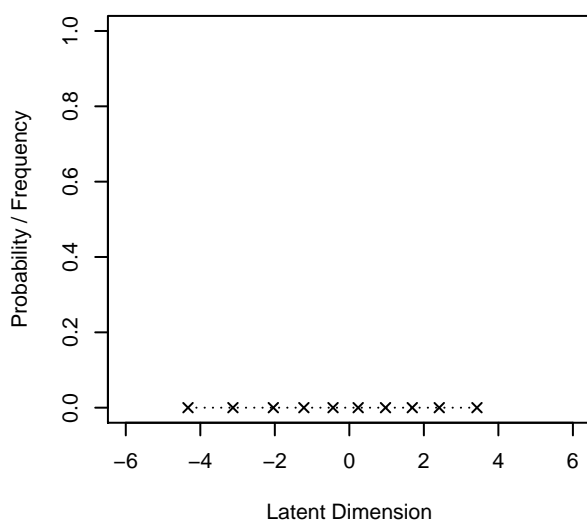

**Felt could not get going**  
Threshold 3

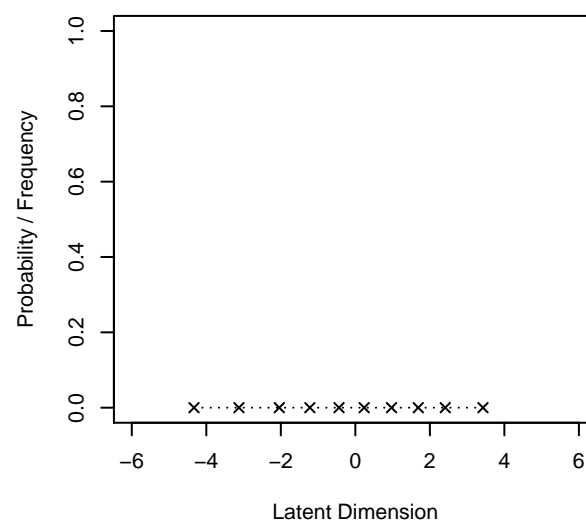

**Felt full of energy**  
Threshold 1

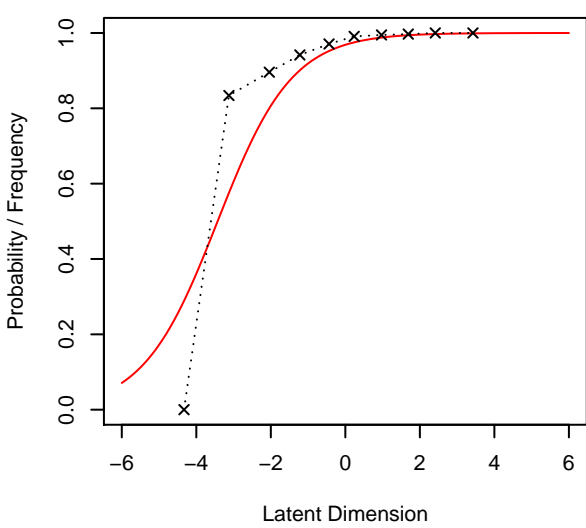

**Felt full of energy**  
Threshold 2

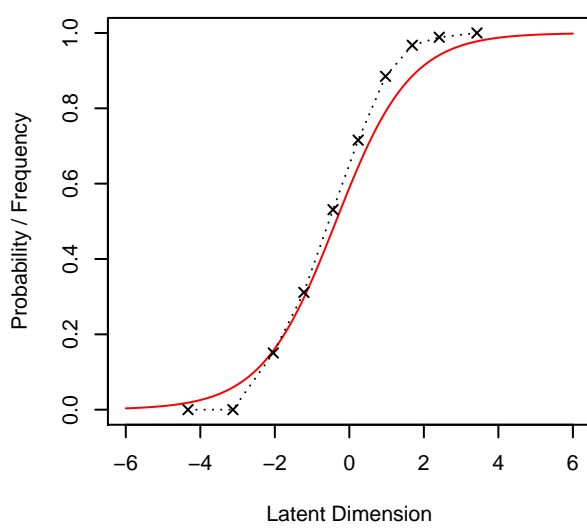

**Felt full of energy**  
Threshold 3

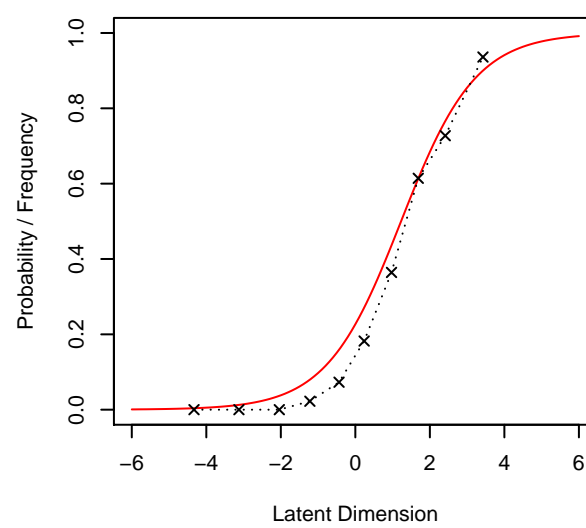

**Felt depressed**  
Threshold 1

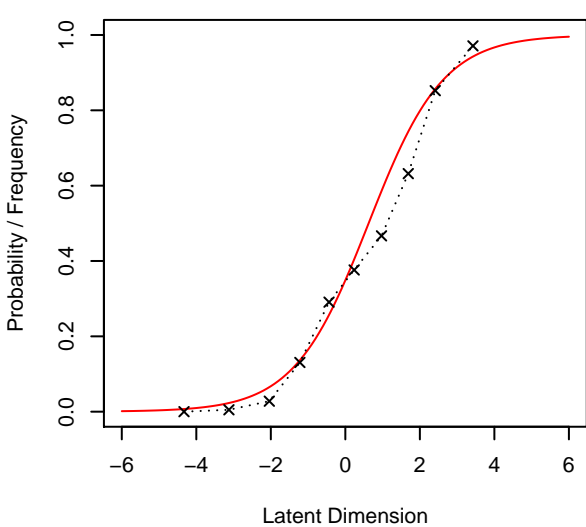

**Felt depressed**  
Threshold 2

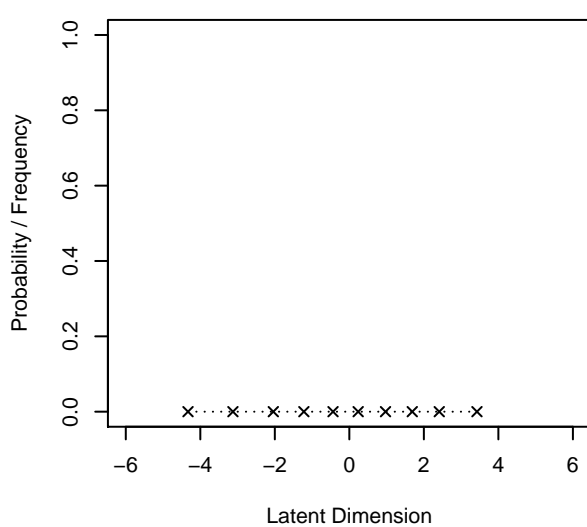

**Felt depressed**  
Threshold 3

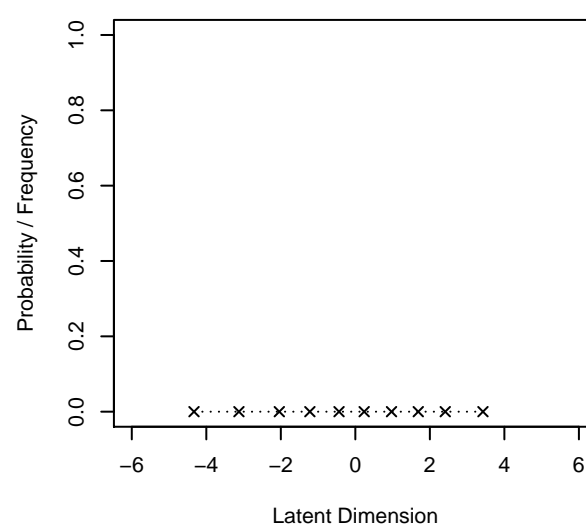

**Felt sad**  
Threshold 1

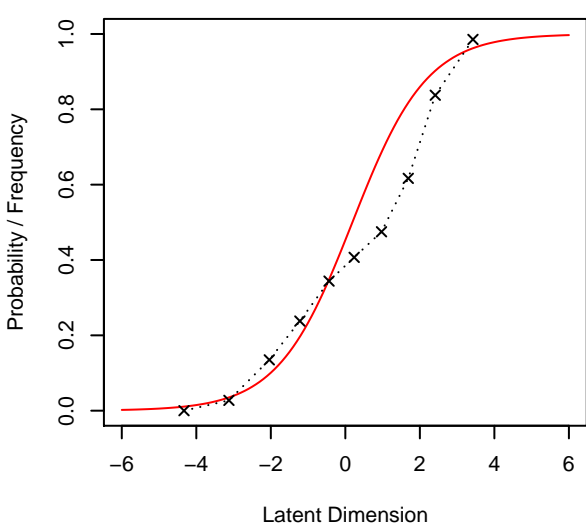

**Felt sad**  
Threshold 2

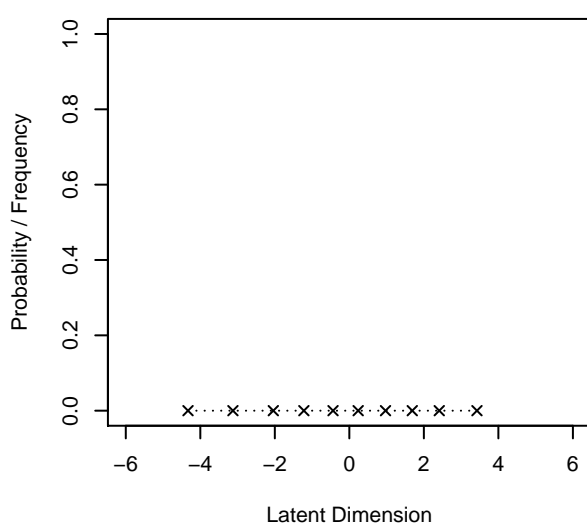

**Felt sad**  
Threshold 3

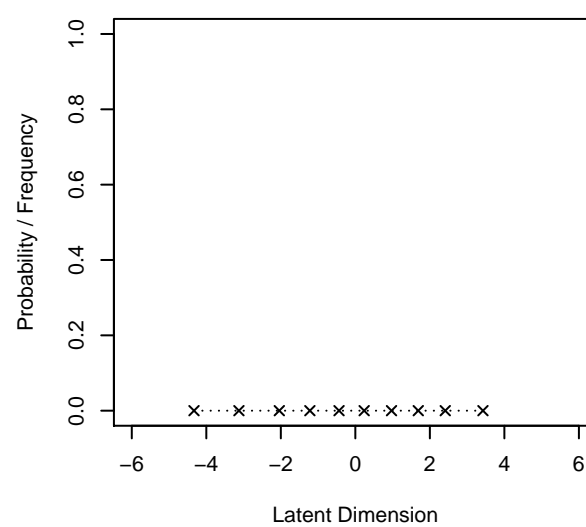

**Was (un)happy**  
Threshold 1

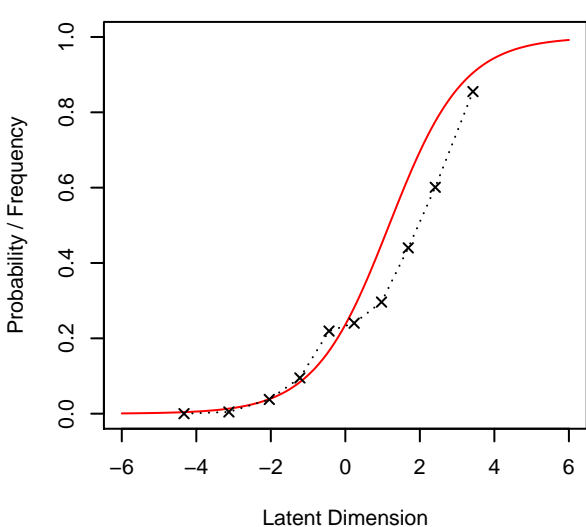

**Was (un)happy**  
Threshold 2

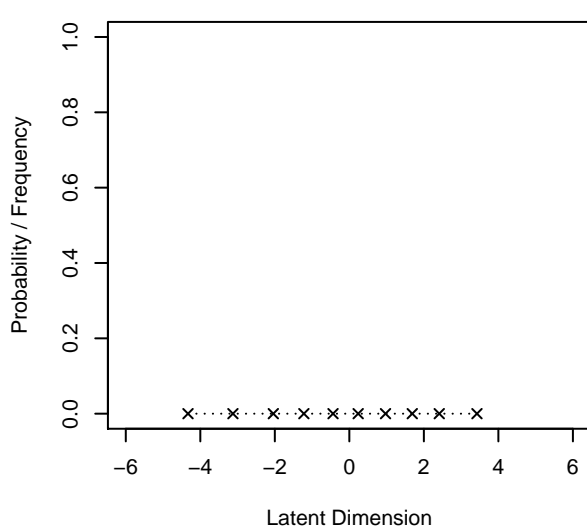

**Was (un)happy**  
Threshold 3

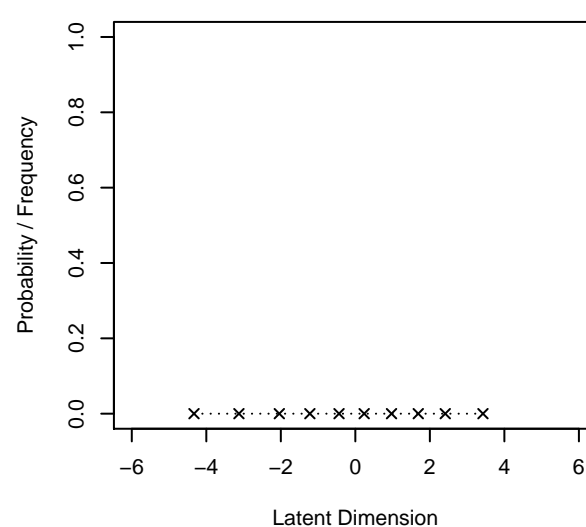

Supplement: 12963_2016_88_MOESM3_ESM.pdf [file 12963_2016_88_MOESM3_ESM.pdf]
