# Supplementary material for: Development of a metric for tracking and comparing population health based on the minimal generic set of domains of functioning and health
Source: PubMed Central journal article supplement (PMC4866300; doi:10.1186/s12963-016-0088-y), 2016-05-12

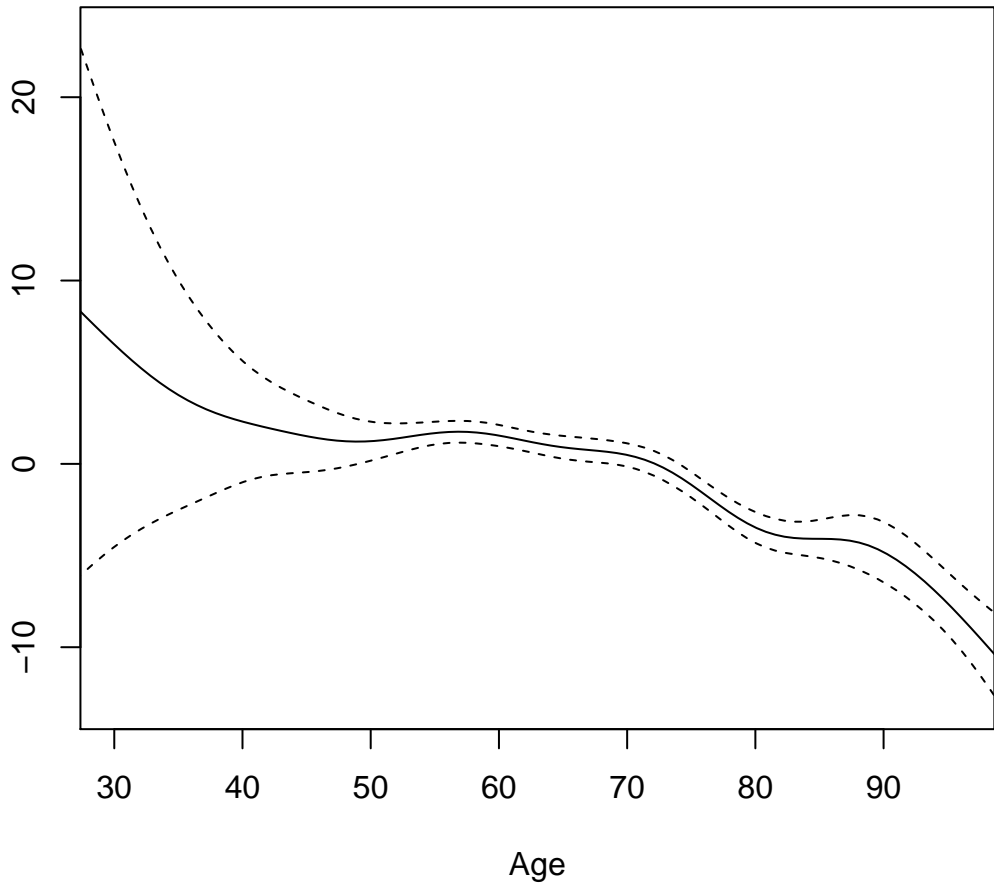

Supplement: 12963_2016_88_MOESM6_ESM.pdf [file 12963_2016_88_MOESM6_ESM.pdf]
